# Supplementary material
Source: publisher site journal article supplement (https://www.dovepress.com/article/563592)
Supplement: Supplementary file 1 [file 563592_Supplementary%20material_1.pdf]

**Table S1 The primers used for qRT-PCR.**

| <b>Gene</b>  | <b>Primer</b> | <b>Sequence (5'-3')</b> |
|--------------|---------------|-------------------------|
| <b>EGFL7</b> | Forward       | TGAATGCAGTGCTAGGAGGG    |
|              | Reverse       | GCACACAGAGTGTACCGTCT    |
| <b>GAPDH</b> | Forward       | GGAGCGAGATCCCTCCAAAAT   |
|              | Reverse       | GGCTGTTGTCATACTTCTCATGG |

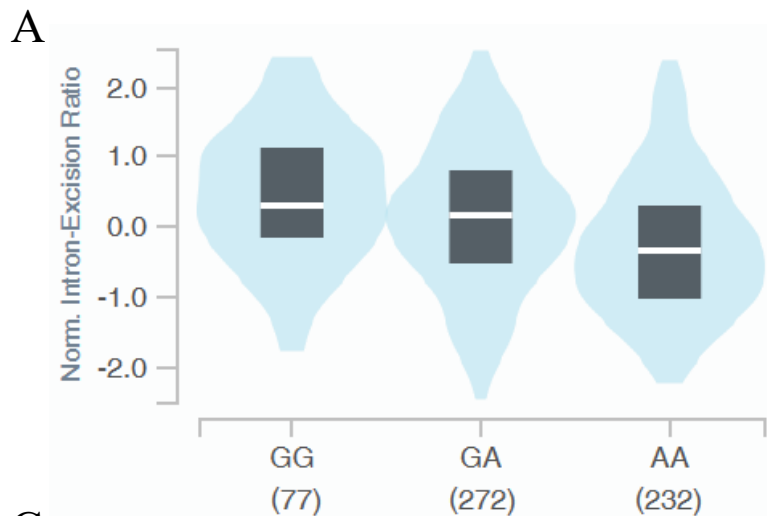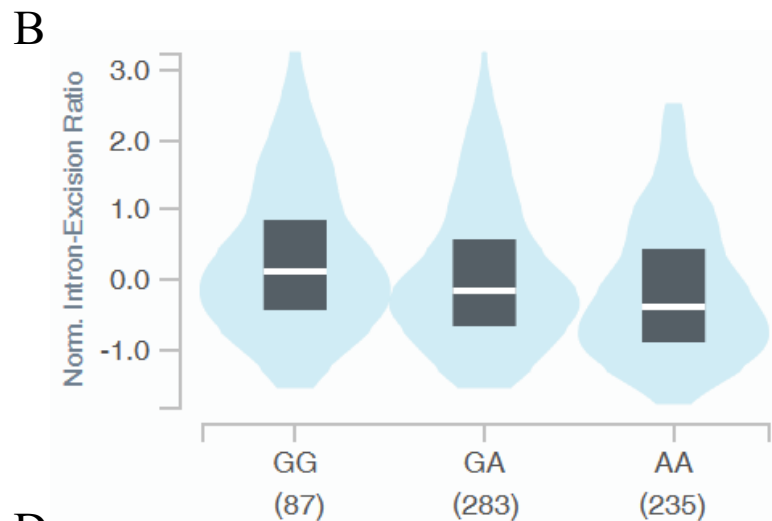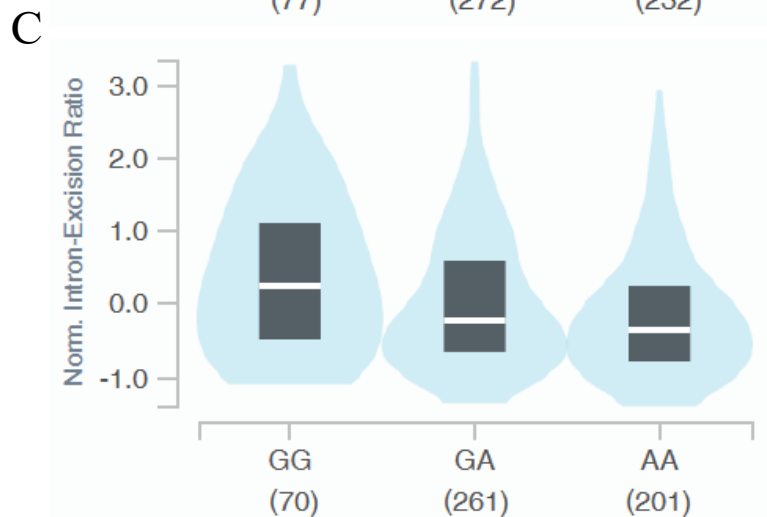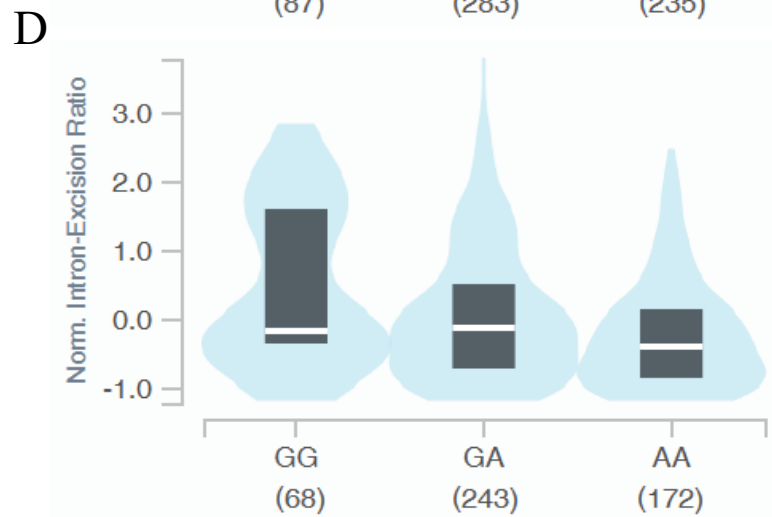

**Figure S1** Analysis of EGFL7 single nucleotide polymorphisms and tissue-specific gene expression levels. The G/G genotype of rs9411260 correlated with decreased EGFL7 expression in adipose (A), skin (B), nerve tissues (C), and cultured fibroblasts (D).

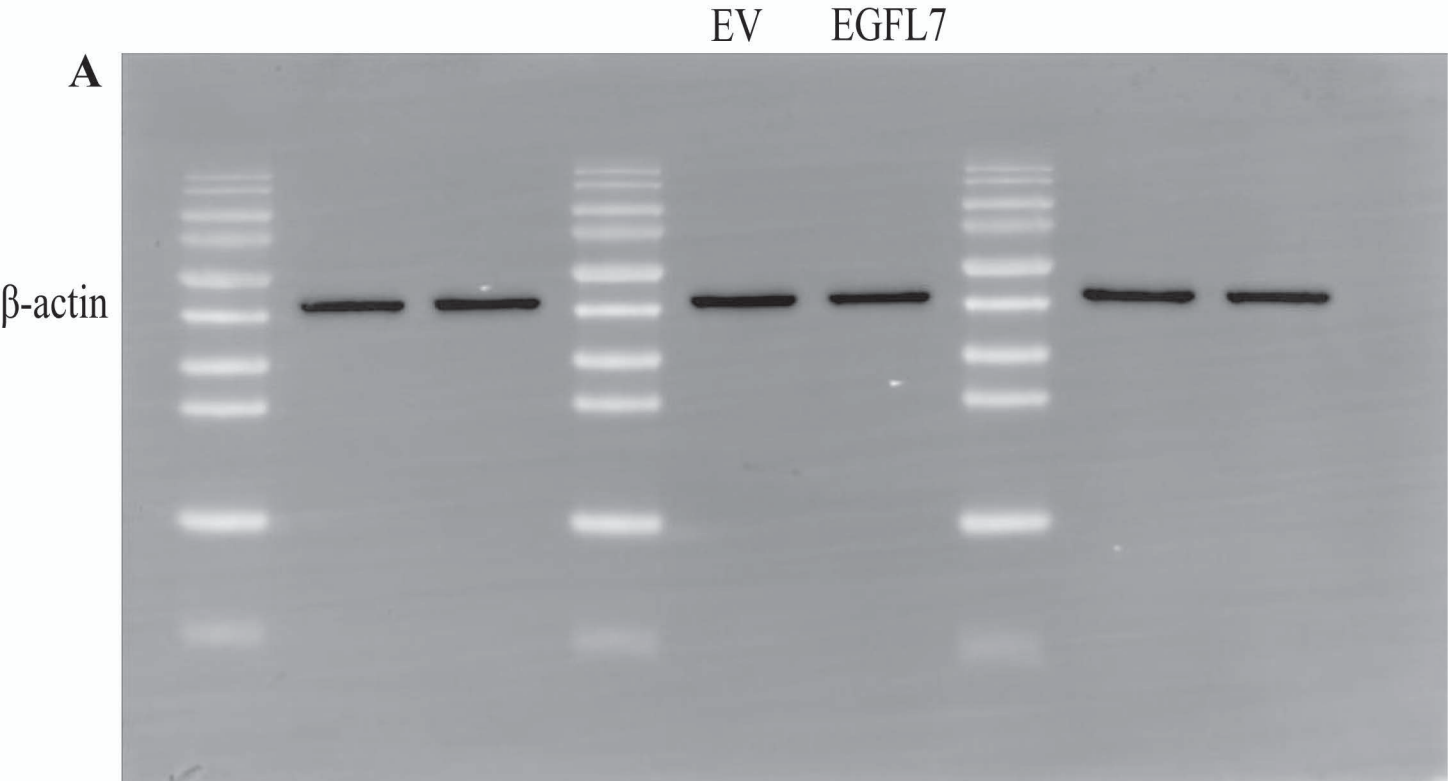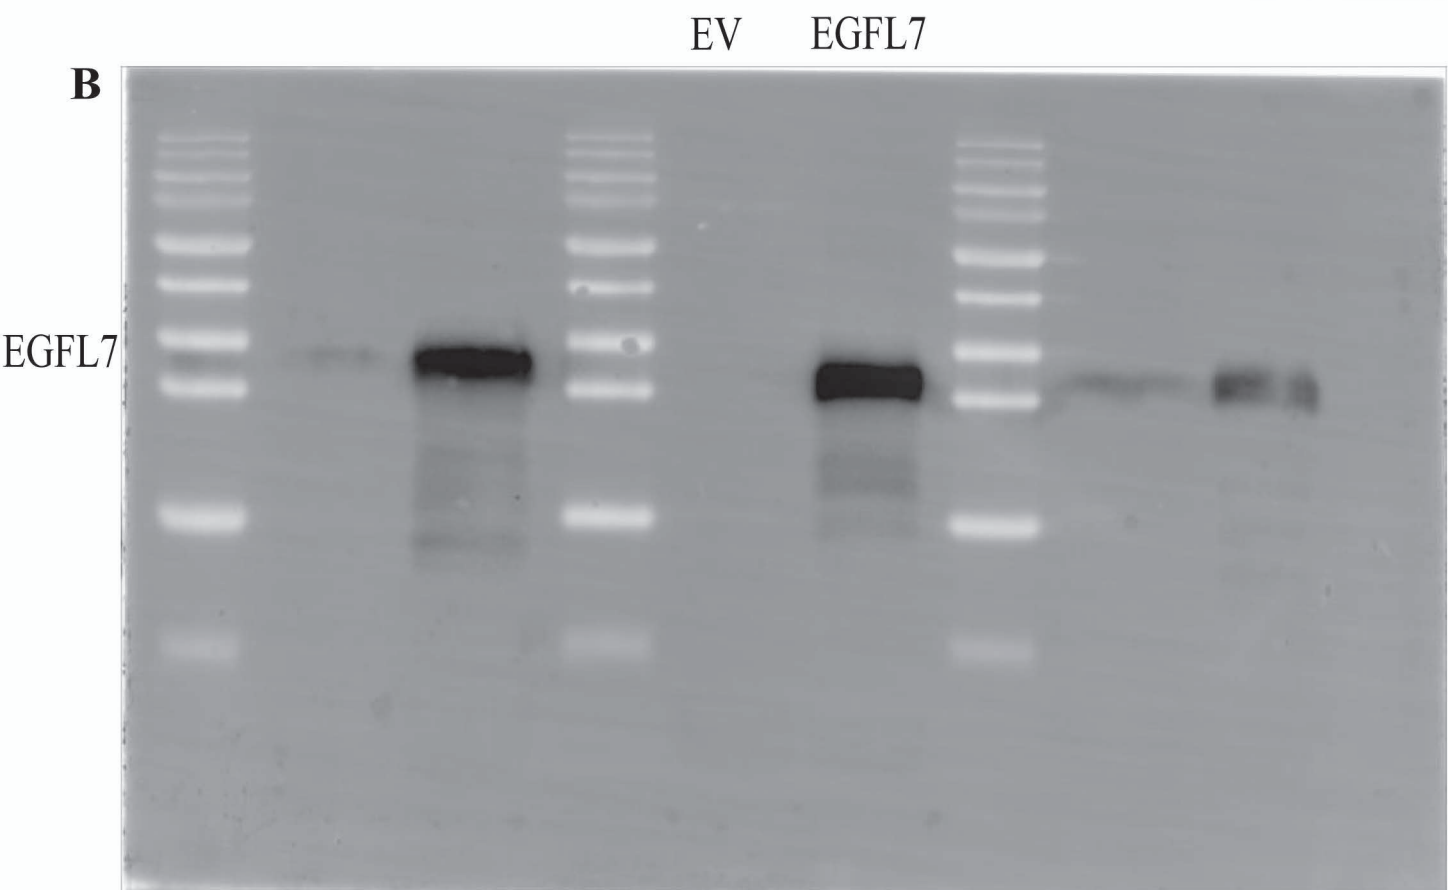

**Figure S2** Expression levels of EGFL7 were validated through Western blotting. (A) Full-length blots of beta-actin. (B) Full-length blots of EGFL7.
